# Supplementary material
Source: Research Square preprint supplement (doi:10.21203/rs.3.rs-9140615/v1)
Supplement: Supplementary file 1 [file 42a133f2a67f314b2c022b1e.xlsx]

## Sheet: Raw Simulation Data
P-T	Initial O content in Fe	Silicate Phase (wt%)								Metal Phase (wt%)							ΔIW	D(H)-mol	D(H)-wt
		Na	Ca	Al	Mg	Fe	Si	O	H	Ca	Al	Mg	Fe	Si	O	H
1GPa2000K	0O	0.989167	3.6879	1.65661	25.1193	0.155531	21.7762	46.4847	0.130716	0	0	0	99.6131	0.351659	0.000990769	0.0342625	-5.70807	0.726421	0.262114
	80O	0.72277	2.93496	2.11511	23.8216	2.0568	21.2501	46.903	0.195699	0	0	0	99.8057	0	0.17504	0.0192656	-3.46365	0.276931	0.0984454
	160O	1.00972	4.04114	1.13428	23.1676	0.976304	22.4192	47.0704	0.181387	0	0	0	99.3662	0	0.618354	0.0154896	-4.10099	0.237881	0.0853951
	240O	0.623611	3.81047	2.95516	23.0839	1.65369	20.7834	46.8828	0.206985	0	0	0	99.353	0	0.628146	0.01884	-3.63383	0.253483	0.0910213
5GPa2300K	0O	0.896004	3.24747	2.59496	25.0336	0.193241	21.5725	46.3852	0.0770337	0	0	0	99.4729	0.41943	0.062606	0.0450813	-5.49733	1.59298	0.585214
	80O	0.801008	2.91487	2.36805	24.0498	1.17701	21.7145	46.8407	0.134013	0	0	0	99.503	0.0130451	0.453064	0.0308781	-3.92808	0.634284	0.230411
	160O	0.815856	3.01224	2.49786	23.6114	1.86152	21.3424	46.7171	0.141667	0	0	0	99.308	0.0307403	0.629538	0.0317261	-3.51944	0.612081	0.223949
	240O	0.829537	3.71302	2.40922	22.9675	0.906713	22.0826	46.9443	0.147094	0	0	0	99.3456	0.000305541	0.621546	0.0325037	-4.14526	0.606026	0.220972
10GPa2500K	0O	0.845883	3.33175	2.48111	25.4495	0.174817	21.4307	46.2413	0.0449976	0	0	0	99.005	0.754185	0.188028	0.0527415	-5.56905	3.13669	1.1721
	80O	0.774588	3.26878	2.4784	23.8922	0.590205	22.1082	46.7998	0.0878087	0	0	0	99.0698	0.111892	0.771877	0.0463809	-4.50233	1.41845	0.528204
	160O	0.788179	3.69551	2.00651	23.4904	1.03212	22.0732	46.8141	0.0998895	0	0	0	98.1835	0.0773416	1.69776	0.0414325	-3.99175	1.09216	0.414783
	240O	0.663795	3.30298	2.226	23.6555	0.823942	22.1451	47.0702	0.112407	0	0	0.0519091	97.2688	0.0836009	2.5277	0.0409753	-4.16346	0.945914	0.364527
15GPa2800K	0O	0.758159	3.57091	2.59975	26.2947	0.220192	20.5244	45.9861	0.0458045	0	0	0	98.5104	0.990135	0.43766	0.057971	-5.35919	3.3466	1.26562
	80O	0.740414	4.00495	2.45359	23.6082	0.820295	22.0006	46.3223	0.0496374	0	0	0	98.4745	0.394388	1.07281	0.0582802	-4.19133	3.06355	1.17412
	160O	1.03458	4.06168	2.24591	23.2134	0.385029	22.3075	46.6996	0.0523787	0	0	0	97.1927	0.358135	2.39422	0.0549109	-4.80858	2.66879	1.04834
	240O	0.722622	3.93779	2.46661	23.2541	0.832378	22.0146	46.6945	0.0774311	0	0	0.00223214	96.4653	0.171778	3.2969	0.0495583	-4.1209	1.60803	0.640031
20GPa3000K	0O	0.809935	3.76466	3.14198	26.7947	0.833729	19.0635	45.5391	0.0524093	0	0	0	97.5386	1.62404	0.780182	0.0571674	-4.18185	2.83701	1.09079
	80O	0.818819	3.30591	2.94207	24.7327	0.771897	21.0616	46.3198	0.0472217	0	0	0.000124624	97.482	0.709624	1.75177	0.0564467	-4.22186	3.07244	1.19536
	160O	0.774588	3.22543	2.71621	24.1982	0.824443	21.5818	46.6246	0.0547243	0	0	0.0158994	95.994	0.470821	3.46381	0.055515	-4.11696	2.52006	1.01445
	240O	0.833513	3.42737	2.70623	24.0944	0.671007	21.4518	46.7493	0.0664098	0	0	0.0945889	94.1282	0.591003	5.13038	0.0547333	-4.24587	1.97693	0.824175
40GPa3500K	0O	0.878062	3.37635	3.2254	28.6742	1.20501	17.6301	44.981	0.02985	0	0	0	96.1921	2.24586	1.49903	0.0624118	-3.83488	5.2742	2.09085
	80O	0.84286	2.89069	3.02719	26.2723	1.59255	19.6485	45.6891	0.0368309	0	0	0	95.7919	1.21449	2.93386	0.0597296	-3.55537	4.0102	1.62173
	160O	0.823376	2.81675	2.87323	26.0506	1.66576	19.8054	45.9308	0.0340999	0	0	0.0404817	93.4423	1.60867	4.84462	0.0587954	-3.45157	4.07623	1.72421
	240O	0.497149	2.65097	2.95102	25.0925	1.89546	20.5388	46.3274	0.0466676	0	0	0.153196	91.6412	0.984561	7.16172	0.0593331	-3.27791	2.88165	1.2714
60GPa3800K	0O	0.928669	3.38246	3.63005	29.5404	2.01738	16.1339	44.3473	0.0198545	0	0	0	95.3049	2.53275	2.09501	0.0673259	-3.36353	8.33694	3.39096
	80O	0.846277	3.13447	3.2187	27.5532	1.65328	18.3794	45.1923	0.0224554	0	0	0.0239901	94.3409	1.86019	3.71035	0.0639709	-3.4928	6.83733	2.8488
	160O	0.719645	3.19988	3.23354	26.2768	3.44269	18.1417	44.9584	0.0273408	0	0	0.0129894	92.7954	1.5273	5.60482	0.0594535	-2.79826	4.9934	2.17453
	240O	0.785263	3.08821	2.90868	24.6826	3.4607	19.64	45.4034	0.0312018	0	0.0224505	0.0658013	91.589	0.990289	7.29053	0.0601506	-2.74711	4.29622	1.92779
80GPa4000K	0O	0.947825	3.45245	3.45259	30.3104	1.90707	15.7747	44.1327	0.0222033	0	0	0.0417482	94.6679	2.74342	2.45937	0.0651414	-3.40557	7.1471	2.93386
	80O	0.942467	2.93842	3.37966	28.1654	2.0434	17.6282	44.878	0.0244054	0	0.00920974	6.73781e-05	93.9107	1.94542	4.07094	0.0636912	-3.3006	6.20355	2.60972
	160O	0.905955	3.16684	2.77255	26.3817	2.36401	19.1379	45.2445	0.0264982	0	0.0408672	0.0990855	92.2357	1.5864	5.97677	0.0611771	-3.11702	5.27677	2.30873
	240O	0.928522	2.85543	2.98122	25.5858	2.53478	19.5585	45.5284	0.0273158	0	0.0114847	0.181858	90.3463	1.20788	8.19349	0.0589444	-2.99425	4.73456	2.15788
100GPa4500K	0O	0.728531	3.11566	2.97425	29.4177	2.03196	17.063	44.6276	0.0411858	0.0181829	0.00524697	0.0740305	90.9519	4.16358	4.6758	0.111252	-3.24446	6.09807	2.70122
	80O	0.730533	2.91714	3.15459	26.975	3.0777	18.2807	44.8248	0.0395915	5.66617e-05	0.0167138	0.0234466	90.968	3.10266	5.77764	0.111476	-2.85432	6.23744	2.81565
	160O	0.599142	2.47303	2.8689	24.7458	5.94822	18.8323	44.4773	0.0553384	0	0	0.134433	90.5507	1.97038	7.23206	0.112451	-2.24475	4.3561	2.03206
	240O	0.757522	2.51882	2.61115	25.0281	4.4371	19.5056	45.0887	0.0529839	0	0.0804463	0.191638	88.3269	2.01901	9.27335	0.108608	-2.44664	4.26137	2.04983
135GPa5000K	0O	0.99666	2.21864	3.82582	30.0059	4.0373	15.1999	43.676	0.0397506	0	0.000336073	0.0796418	88.829	5.46738	5.51267	0.110956	-2.6006	6.0742	2.79131
	80O	1.16302	3.22629	2.71971	27.32	5.2975	16.7427	43.484	0.046783	0	0	0.0974002	88.5566	4.21903	7.01133	0.115674	-2.33328	5.21224	2.47256
	160O	0.784422	2.44434	2.7967	26.7045	6.17111	17.3511	43.701	0.0468942	0.193262	0.112319	0.285196	86.8288	3.51445	8.88656	0.111959	-2.14844	4.86084	2.38748
	240O	1.16841	3.535	3.31241	23.8509	7.15226	17.4163	43.5038	0.0609374	0.0993961	0.030835	0.822674	84.2372	3.0387	11.6771	0.0940101	-1.93482	2.98341	1.54273
